# Supplementary material for: Impact of Mobilization Strategies on Peripheral Blood Stem Cell Collection Efficiency and Product Quality: A Retrospective Single-Center Study
Source: MDPI journal article supplement (doi:10.3390/cancers14246259), 2022-12-19
Supplement: s1 [file s1]

Supplementary material

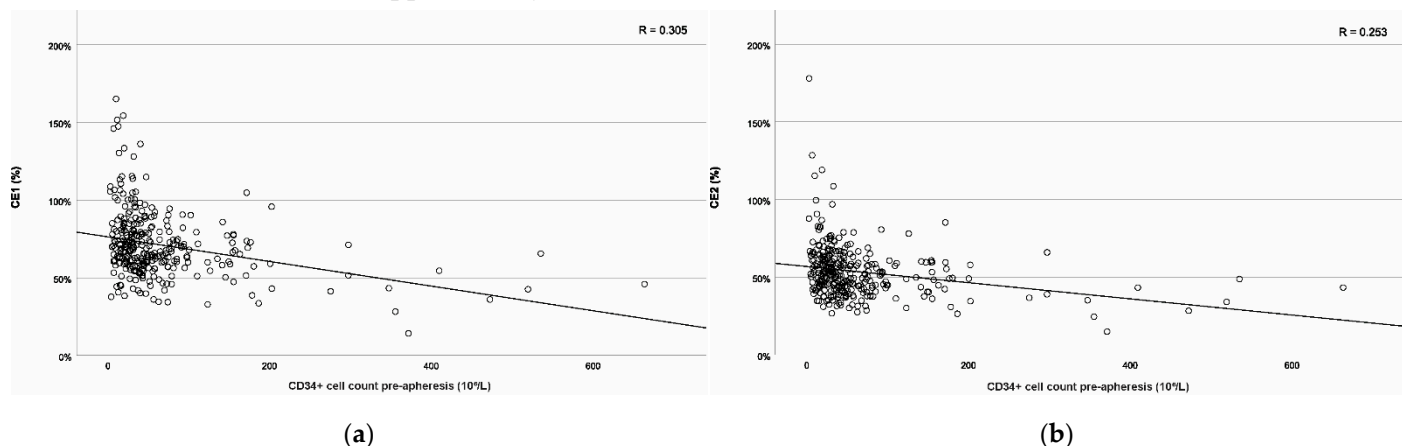

**Figure S1.** Relationship (linear regression analysis) between CD34+ cell count pre-apheresis and (a) CE1 or (b) CE2. CE, collection efficiency.

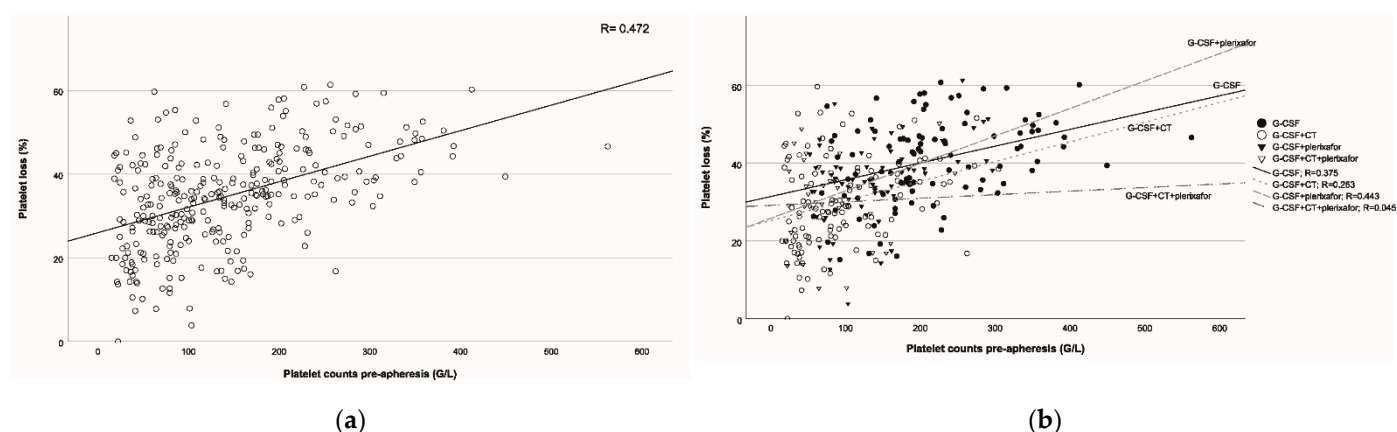

**Figure S2.** Relationship (linear regression analysis) between platelet count pre-apheresis and platelet loss (a) overall and (b) by mobilization regimen. G-CSF, granulocyte colony-stimulating factor; CT, chemotherapy.

**Table S1.** P-values from the Kruskal-Wallis test for between-subgroup comparisons of cell counts, product characteristics and performance of the collection protocol

|                                        | G-CSF vs<br>G-CSF + CT | G-CSF vs<br>G-CSF + plerixafor | G-CSF vs<br>G-CSF +CT +<br>plerixafor | G-CSF + CT vs<br>G-CSF +<br>plerixafor | G-CSF + CT vs<br>G-CSF + CT +<br>plerixafor | G-CSF + CT +<br>plerixafor vs G-CSF +<br>plerixafor |
|----------------------------------------|------------------------|--------------------------------|---------------------------------------|----------------------------------------|---------------------------------------------|-----------------------------------------------------|
| Recipient TBV (mL)                     | 0.383                  | 0.890                          | 0.154                                 | 0.529                                  | 0.407                                       | 0.218                                               |
| Recipient weight (kg)                  | 0.015                  | 0.340                          | 0.034                                 | 0.242                                  | 0.672                                       | 0.208                                               |
| <i>Pre-apheresis cell counts</i>       |                        |                                |                                       |                                        |                                             |                                                     |
| White blood cells (10 <sup>9</sup> /L) | <0.001                 | 0.750                          | 0.036                                 | <0.001                                 | 0.007                                       | 0.027                                               |
| Platelets (10 <sup>9</sup> /L)         | <0.001                 | <0.001                         | <0.001                                | <0.001                                 | 0.397                                       | <0.001                                              |
| Hematocrit (%)                         | <0.001                 | 0.028                          | <0.001                                | <0.001                                 | 0.087                                       | <0.001                                              |
| CD34+ cells (/μL)                      | <0.001                 | 0.107                          | 0.007                                 | <0.001                                 | <0.001                                      | 0.188                                               |
| CD34+ (%)                              | <0.001                 | 0.057                          | 0.130                                 | <0.001                                 | <0.001                                      | 0.967                                               |
| <i>Post-apheresis</i>                  |                        |                                |                                       |                                        |                                             |                                                     |
| CD34+ change (%)                       | 0.006                  | 0.346                          | 0.002                                 | 0.145                                  | 0.253                                       | 0.033                                               |
| <i>Product characteristics</i>         |                        |                                |                                       |                                        |                                             |                                                     |
| White blood cells (10 <sup>9</sup> /L) | <0.001                 | 0.069                          | 0.013                                 | <0.001                                 | 0.993                                       | <0.001                                              |

|                                        |        |        |        |        |        |        |
|----------------------------------------|--------|--------|--------|--------|--------|--------|
| Platelets (10 <sup>9</sup> /L)         | <0.001 | <0.001 | <0.001 | <0.001 | 0.135  | <0.001 |
| Hematocrit (%)                         | 0.264  | 0.304  | 0.662  | 0.040  | 0.219  | 0.720  |
| CD34+ x10 <sup>6</sup> product         | <0.001 | 0.121  | 0.003  | <0.001 | <0.001 | 0.117  |
| CD34+ cells (10 <sup>6</sup> /kg b.w.) | <0.001 | 0.140  | 0.002  | <0.001 | <0.001 | 0.087  |
| Whole blood processed                  | <0.001 | 0.981  | 0.500  | <0.001 | 0.002  | 0.515  |
| TBV processed                          | <0.001 | 0.966  | 0.698  | <0.001 | <0.001 | 0.692  |
| Apheresis time                         | <0.001 | 0.911  | 0.967  | <0.001 | <0.001 | 0.901  |
| CD34+ CE 2 (%)                         | 0.056  | 0.480  | 0.757  | 0.016  | 0.292  | 0.406  |
| CD34+ CE1 (%)                          | 0.009  | 0.691  | 0.125  | 0.006  | 0.751  | 0.081  |
| Platelet loss (%)                      | <0.001 | 0.017  | <0.001 | 0.001  | 0.985  | 0.014  |
| Platelet CE1 (%)                       | <0.001 | 0.289  | <0.001 | <0.001 | 0.067  | <0.001 |
| CD34+ TP2                              | 0.019  | 0.374  | 0.418  | 0.003  | 0.395  | 0.149  |
| CD34+ TP1                              | <0.001 | <0.001 | 0.023  | <0.001 | 0.737  | 0.027  |
| CD34+ recruitment factor               | <0.001 | 0.295  | 0.286  | <0.001 | <0.001 | 0.844  |

G-CSF, granulocyte colony-stimulating factor; CT, chemotherapy; b.w., body weight; TBV, total blood volume; CE, collection efficiency; TP, throughput.

**Table S2.** Summary of simple regression analysis calculating the impact of mobilization method (with or without plerixafor) on CE1 and CE2

| Model summary <sup>a</sup> | R                       | R <sup>2</sup>     | Adjusted R <sup>2</sup> | SE of the estimate |                                 |
|----------------------------|-------------------------|--------------------|-------------------------|--------------------|---------------------------------|
| CE1                        | 0.071                   | 0.05               | 0.002                   | 21.35715%          |                                 |
| CE2                        | 0.114                   | 0.013              | 0.010                   | 16.77803%          |                                 |
| ANOVA <sup>b</sup>         | Sum of squares          | Degrees of freedom | Mean square             | F-ratio            | Significance level <sup>a</sup> |
| CE1                        |                         |                    |                         |                    |                                 |
| Regression                 | 712.611                 | 1                  | 712.611                 | 1.562              | 0.212                           |
| Residual                   | 140031.251              | 307                | 456.128                 |                    |                                 |
| Total                      | 140743.862              | 308                |                         |                    |                                 |
| CE2                        |                         |                    |                         |                    |                                 |
| Regression                 | 1134.379                | 1                  | 1134.379                | 4.030              | 0.046                           |
| Residual                   | 86421.226               | 307                | 281.502                 |                    |                                 |
| Total                      | 87555.605               | 308                |                         |                    |                                 |
| Coefficients <sup>b</sup>  | Unstandardized beta (B) | SE B               | Standardized beta β     | t test             | Significance level              |
| CE1                        |                         |                    |                         |                    |                                 |
| (Constant)                 | 70.165                  | 1.474              |                         | 47.608             | 0.000                           |
| Mobilization               | 3.254                   | 2.604              | 0.071                   | 1.250              | 0.212                           |
| CE2                        |                         |                    |                         |                    |                                 |
| (Constant)                 | 52.205                  | 1.158              |                         | 45.090             | 0.000                           |
| Mobilization               | 4.106                   | 2.045              | 0.114                   | 2.007              | 0.046                           |

CE, collection efficiency; SE, standard error.

Notes: <sup>a</sup> Predictors: (constant), mobilization method (0–1 variable; with or without plerixafor)

<sup>b</sup> Dependent variable: CE (%)
